# Supplementary material
Source: PubMed Central journal article supplement (PMC5096989)
Supplement: NIHMS812903-supplement-259_2016_3477_MOESM2_ESM.pdf [file NIHMS812903-supplement-259_2016_3477_MOESM2_ESM.pdf]

**Supplemental Table 1** Summary sensor and PET data from all 10 cases

| Case Number <sup>a</sup>                                      | Infiltration visible on PET ( <i>n</i> = 4) |                      |                   |               | Infiltration not visible on PET ( <i>n</i> = 6) |               |               |               |               |               |
|---------------------------------------------------------------|---------------------------------------------|----------------------|-------------------|---------------|-------------------------------------------------|---------------|---------------|---------------|---------------|---------------|
|                                                               | 2                                           | 3                    | 4                 | 5             | 1                                               | 6             | 7             | 8             | 9             | 10            |
| Infiltration appearance on sensor TAC                         | Severe, persistent                          | Moderate, persistent | Severe, resolving | None detected | None detected                                   | None detected | None detected | None detected | None detected | None detected |
| Infiltration appearance on PET                                | Severe                                      | Small                | Moderate          | Small (spot)  | None detected                                   | None detected | None detected | None detected | None detected | None detected |
| <b><i>FDG infusion peak only (AUC, integrated counts)</i></b> |                                             |                      |                   |               |                                                 |               |               |               |               |               |
| Injection arm (x 10 <sup>6</sup> )                            | 0.18                                        | 0.039                | 0.29              | 0.044         | 0.059                                           | 0.033         | 0.12          | 0.18          | 0.025         | 0.043         |
| I/C ratio                                                     | 52.30                                       | 8.04                 | 30.17             | 11.26         | 18.90                                           | 29.20         | 14.57         | 27.11         | 19.18         | 7.50          |
| <b><i>0-10 min post-FDG (AUC, integrated counts)</i></b>      |                                             |                      |                   |               |                                                 |               |               |               |               |               |
| Injection arm (x 10 <sup>6</sup> )                            | 1.32                                        | 0.38                 | 1.50              | 0.19          | 0.13                                            | 0.16          | 0.32          | 0.33          | 0.14          | 0.18          |
| I/C ratio                                                     | 32.58                                       | 3.28                 | 15.47             | 1.58          | 1.57                                            | 1.52          | 1.24          | 2.62          | 1.51          | 1.66          |
| <b><i>0-20 min post-FDG (AUC, integrated counts)</i></b>      |                                             |                      |                   |               |                                                 |               |               |               |               |               |
| Injection arm (x 10 <sup>6</sup> )                            | 2.38                                        | 0.67                 | 2.69              | 0.34          | 0.21                                            | 0.29          | 0.54          | 0.49          | 0.26          | 0.32          |
| I/C ratio                                                     | 25.80                                       | 2.80                 | 12.61             | 1.39          | 1.11                                            | 1.37          | 1.04          | 1.87          | 1.37          | 1.47          |
| <b><i>0-30 min post-FDG (AUC, integrated counts)</i></b>      |                                             |                      |                   |               |                                                 |               |               |               |               |               |
| Injection arm (x 10 <sup>6</sup> )                            | 3.62                                        | 0.92                 | 3.63              | 0.47          | 0.28                                            | 0.44          | 0.75          | 0.64          | 0.38          | 0.47          |
| I/C ratio                                                     | 23.54                                       | 2.58                 | 11.01             | 1.32          | 0.96                                            | 1.31          | 0.96          | 1.61          | 1.32          | 1.43          |
| <b><i>0-40 min post-FDG (AUC, integrated counts)</i></b>      |                                             |                      |                   |               |                                                 |               |               |               |               |               |
| Injection arm (x 10 <sup>6</sup> )                            | 4.56                                        | 1.12                 | 4.37              | 0.58          | 0.36                                            | 0.59          | 0.95          | 0.78          | 0.50          | 0.61          |
| I/C ratio                                                     | 20.71                                       | 2.35                 | 9.76              | 1.28          | 0.88                                            | 1.28          | 0.92          | 1.47          | 1.30          | 1.40          |
| <b><i>30-40 min post-FDG (AUC, integrated counts)</i></b>     |                                             |                      |                   |               |                                                 |               |               |               |               |               |
| Injection arm (x 10 <sup>6</sup> )                            | 0.94                                        | 0.20                 | 0.74              | 0.12          | 0.073                                           | 0.15          | 0.20          | 0.14          | 0.12          | 0.14          |
| I/C ratio                                                     | 14.16                                       | 1.67                 | 6.26              | 1.15          | 0.68                                            | 1.20          | 0.78          | 1.06          | 1.24          | 1.31          |
| <b><i>FDG-PET (SUV<sub>max</sub>)</i></b>                     |                                             |                      |                   |               |                                                 |               |               |               |               |               |
| Injection site VOI                                            | 2550.78                                     | 15.99                | 41.54             | 6.18          | 1.50                                            | 1.03          | 0.97          | 1.66          | 1.27          | 1.12          |
| I/C ratio                                                     | 885.54                                      | 4.52                 | 10.55             | 1.99          | 0.33                                            | 0.35          | 0.36          | 0.54          | 0.42          | 0.39          |
| <b><i>FDG-PET (SUV<sub>peak</sub>)</i></b>                    |                                             |                      |                   |               |                                                 |               |               |               |               |               |
| Injection site VOI                                            | 1672.88                                     | 9.23                 | 29.40             | 3.44          | 0.95                                            | 0.79          | 0.86          | 1.39          | 1.08          | 0.96          |
| I/C ratio                                                     | 674.16                                      | 3.30                 | 9.45              | 1.43          | 0.30                                            | 0.31          | 0.37          | 0.53          | 0.41          | 0.39          |

*AUC*, area-under-curve; *TAC*, time activity curve; *I/C*, injection/control (contralateral arm for sensors; right liver lobe for PET); *VOI*, volume of interest; *SUV*, standardized uptake value. <sup>a</sup>Case numbers 1-5 correspond to Panels A-E (respectively) in Figs. 2 and 3
