# Supplementary material
Source: PubMed Central journal article supplement (PMC5096989)

# Supplemental Figure 1

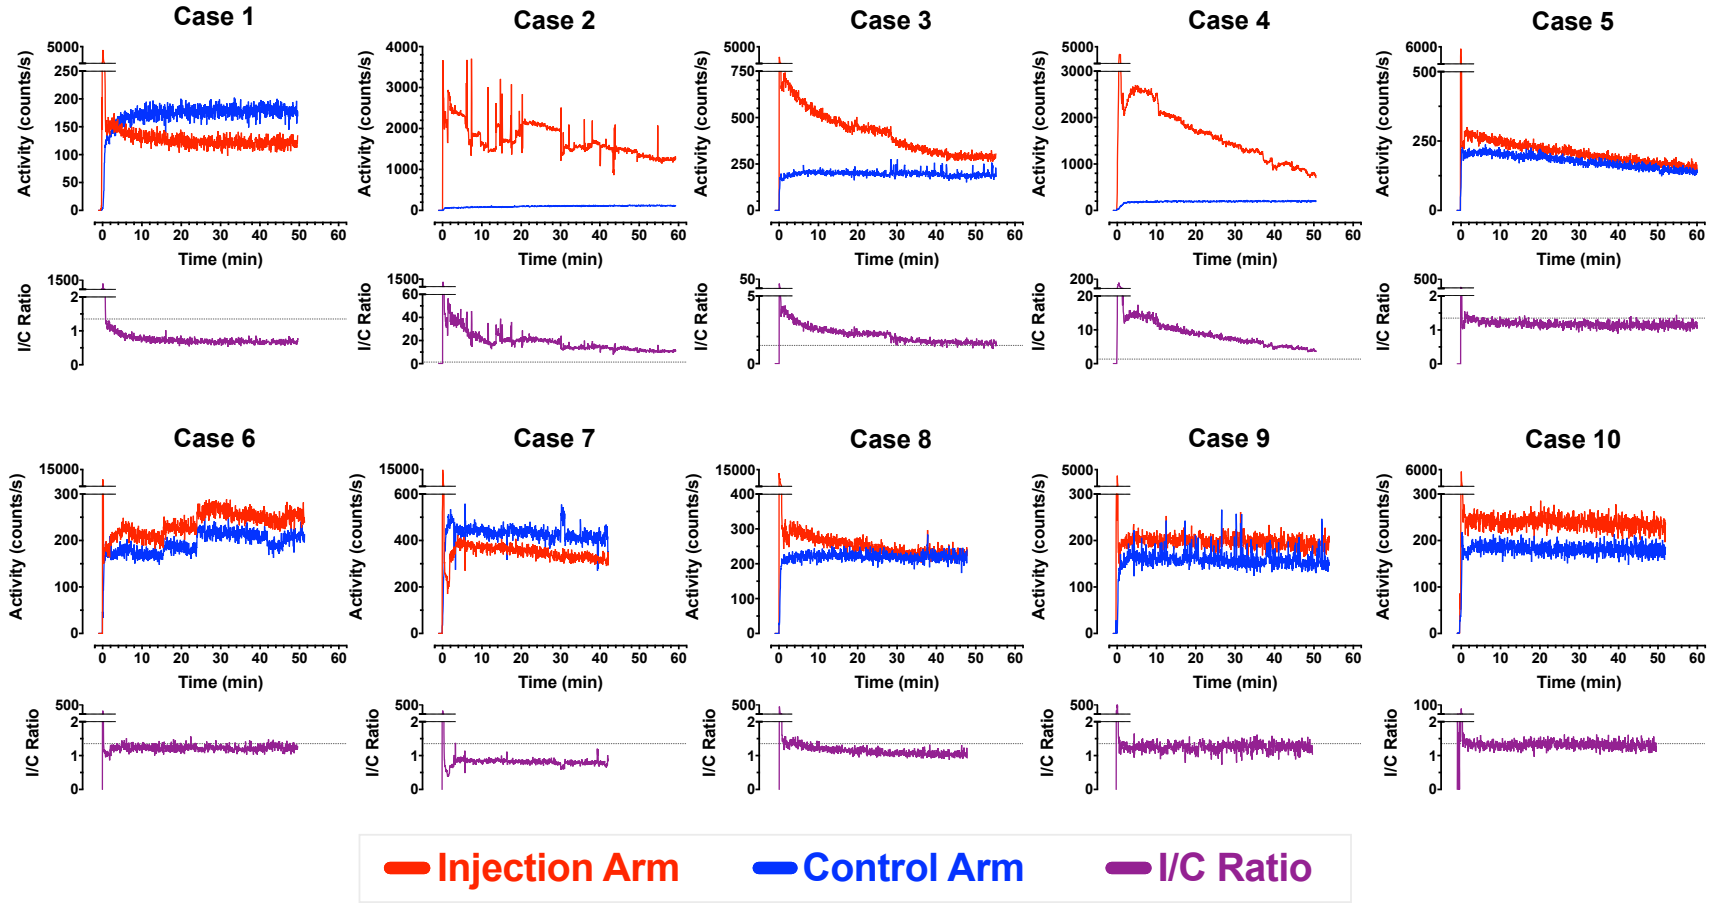

Supplement: NIHMS812903-supplement-259_2016_3477_MOESM1_ESM.pdf [file NIHMS812903-supplement-259_2016_3477_MOESM1_ESM.pdf]
